# Supplementary material for: Zika virus targets human trophoblast stem cells and prevents syncytialization in placental trophoblast organoids
Source: Springer Nature journal article supplement (doi:10.1038/s41467-023-41158-0), 2023-09-08
Supplement: 41467_2023_41158_MOESM1_ESM.pdf [file 41467_2023_41158_MOESM1_ESM.pdf]

## **Supplementary information**

### **Supplementary figures**

#### **Table S1-8**

# Figure S1

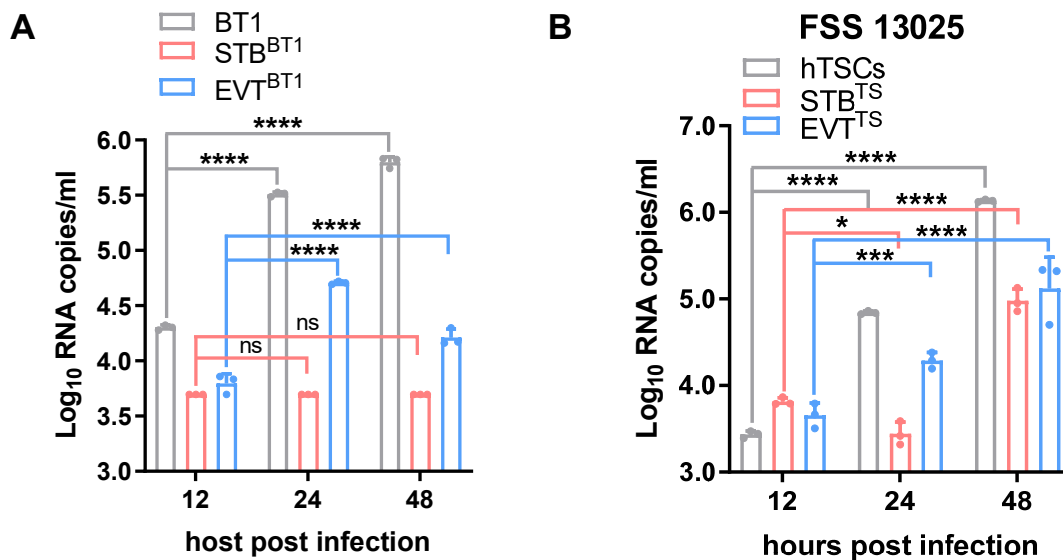

## Figure S1. Detection of ZIKV RNA in the supernatants of ZIKV-infected hTSC-derived trophoblast cells.

(A) Quantification of ZIKV RNA in the supernatants of BT1, STB<sup>BT1</sup> and EVT<sup>BT1</sup> at 12, 24 and 48 hours post infection. The BT1, STB<sup>BT1</sup> and EVT<sup>BT1</sup> were infected with ZIKV at an MOI of 0.1. Two-way ANOVA analysis was used for statistical analysis of significance. n=3 independent experiments. \*\*\*\*, p<0.0001. ns, no significance.

(B) Quantification of ZIKV RNA in the supernatants of hTSCs, STB<sup>TS</sup> and EVT<sup>TS</sup> at 12, 24 and 48 hours post infection. The hTSCs, STB<sup>TS</sup> and EVT<sup>TS</sup> were infected with ZIKV strain FSS 13025 at an MOI of 0.1. Two-way ANOVA analysis was used for statistical analysis of significance. n=3 independent experiments. STB<sup>TS</sup>, 12 hpi vs 24 hpi, \*, p=0.18. EVT<sup>TS</sup>, 12 hpi vs 24 hpi, \*\*\*, p=0.0002. \*\*\*\*, p<0.0001.

Data in this figure are shown as the mean  $\pm$  s.d.

# Figure S2

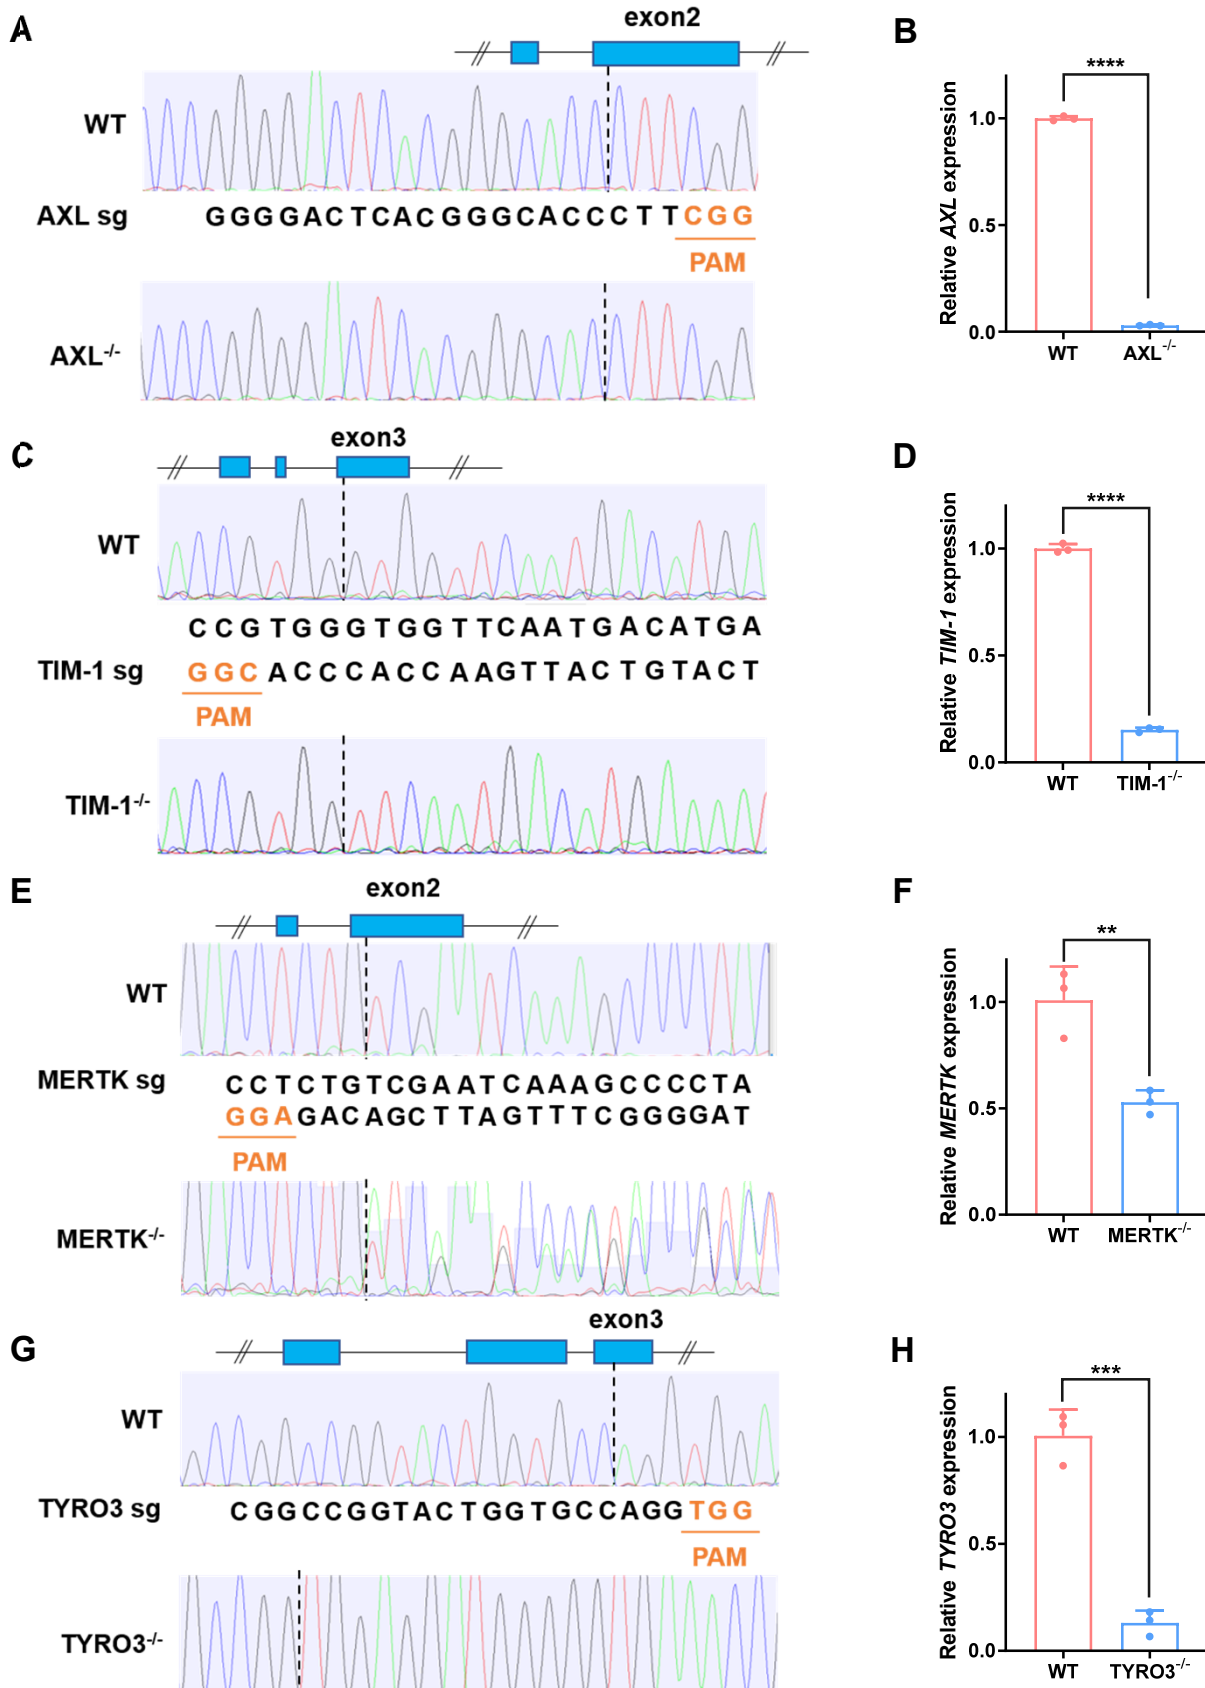

**Figure S2. Knockout of AXL, TIM-1, MERTK and TYRO3 in hTSCs using CRISPR/Cas9 system.**

(A, C, E, and G) Sanger sequencing results of sgRNA target sites in wildtype (WT), AXL<sup>-/-</sup> (panel A), TIM-1<sup>-/-</sup> (panel C), MERTK<sup>-/-</sup> (panel E) and TYRO3<sup>-/-</sup> (panel G) hTSCs. (B, D, F, and H) Quantification of AXL, TIM-1, TYRO3, and MERTK mRNA expression in WT, AXL<sup>-/-</sup> (panel B), TIM-1<sup>-/-</sup> (panel D), MERTK<sup>-/-</sup> (panel F) and TYRO3<sup>-/-</sup> (panel H) hTSCs. Two-tailed unpaired t test was used for statistical analysis of significance. n=3 independent experiments. Panel F, \*\*, p=0.0079. Panel H, \*\*\*, p=0.0004. \*\*\*\*, p<0.0001. Data in this figure are shown as the mean ± s.d.

# Figure S3

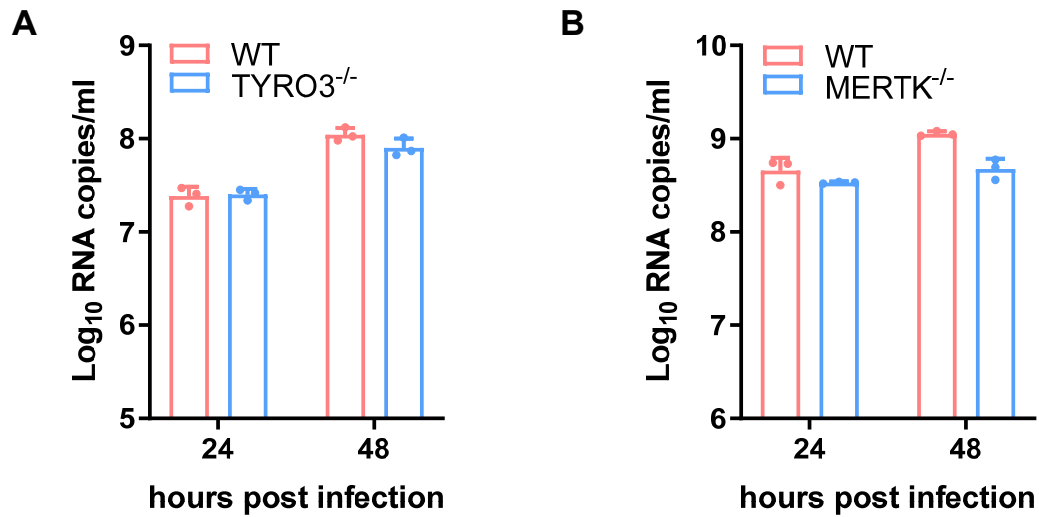

**Figure S3. Growth of ZIKV RNA in the supernatants of ZIKV-infected WT,  $\text{TYRO3}^{-/-}$  and  $\text{MERTK}^{-/-}$  hTSCs.**

(A and B) Quantification of ZIKV RNA in the supernatants of ZIKV-infected WT,  $\text{TYRO3}^{-/-}$  (panel A) and  $\text{MERTK}^{-/-}$  (panel B) hTSCs. The cells were exposed to ZIKV infection at an MOI of 0.1, and analyzed at 24 and 48 hours post infection.  $n=3$  independent experiments. Data in this figure are shown as the mean  $\pm$  s.d.

# Figure S4

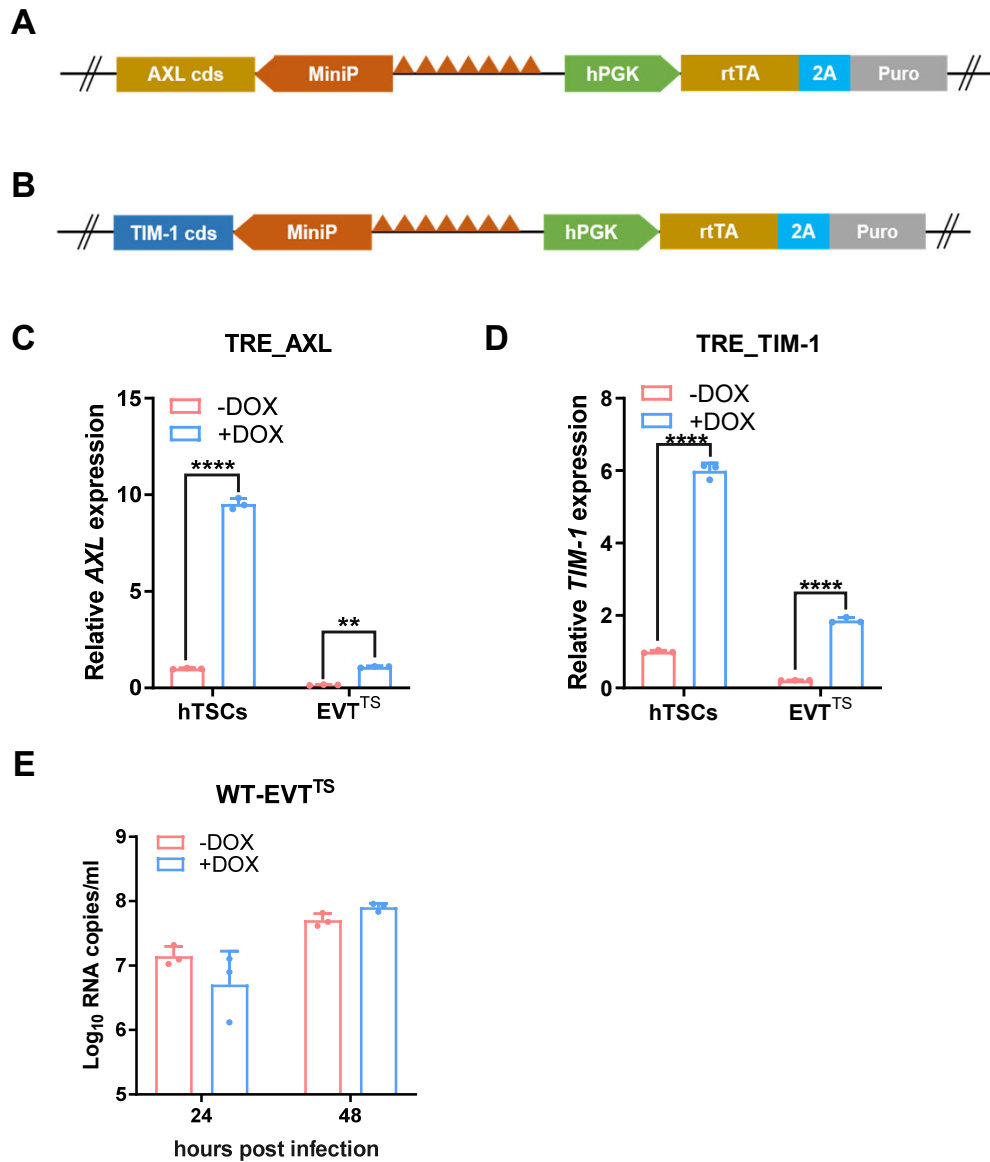

## Figure S4. Overexpression of AXL and TIM-1 in EVT<sup>TS</sup>.

(A and B) The lentiviral vectors used for DOX-induced overexpression of AXL (A) or TIM-1 (B) in EVT<sup>TS</sup>. MiniP, mini promoter. ▲, tet operator. rtTA, a reverse transcriptional activator. 2A, P2A self-cleaving peptide. Puro, puromycin selection marker.

(C) Quantification of AXL expression in TRE\_AXL-hTSCs and TRE\_AXL-EVT<sup>TS</sup> under DOX induction. Two-way ANOVA analysis was used for statistical analysis of significance. n=3 independent experiments. \*\*, p=0.0037. \*\*\*\*, p<0.0001.

(D) Quantification of TIM-1 expression in TRE\_TIM-1-hTSCs and TRE\_TIM-1-EVT<sup>TS</sup> under DOX induction. Two-way ANOVA analysis was used for statistical analysis of significance. n=3 independent experiments. \*\*\*\*, p<0.0001.

(E) Quantification of viral RNA in the supernatants of ZIKV-infected WT-EVT<sup>TS</sup> at 24 and 48 hours post infection. The WT-EVT<sup>TS</sup> was exposed to ZIKV at MOI 0.1. n=3 independent experiments.

Data in this figure are shown as the mean  $\pm$  s.d.

# Figure S5

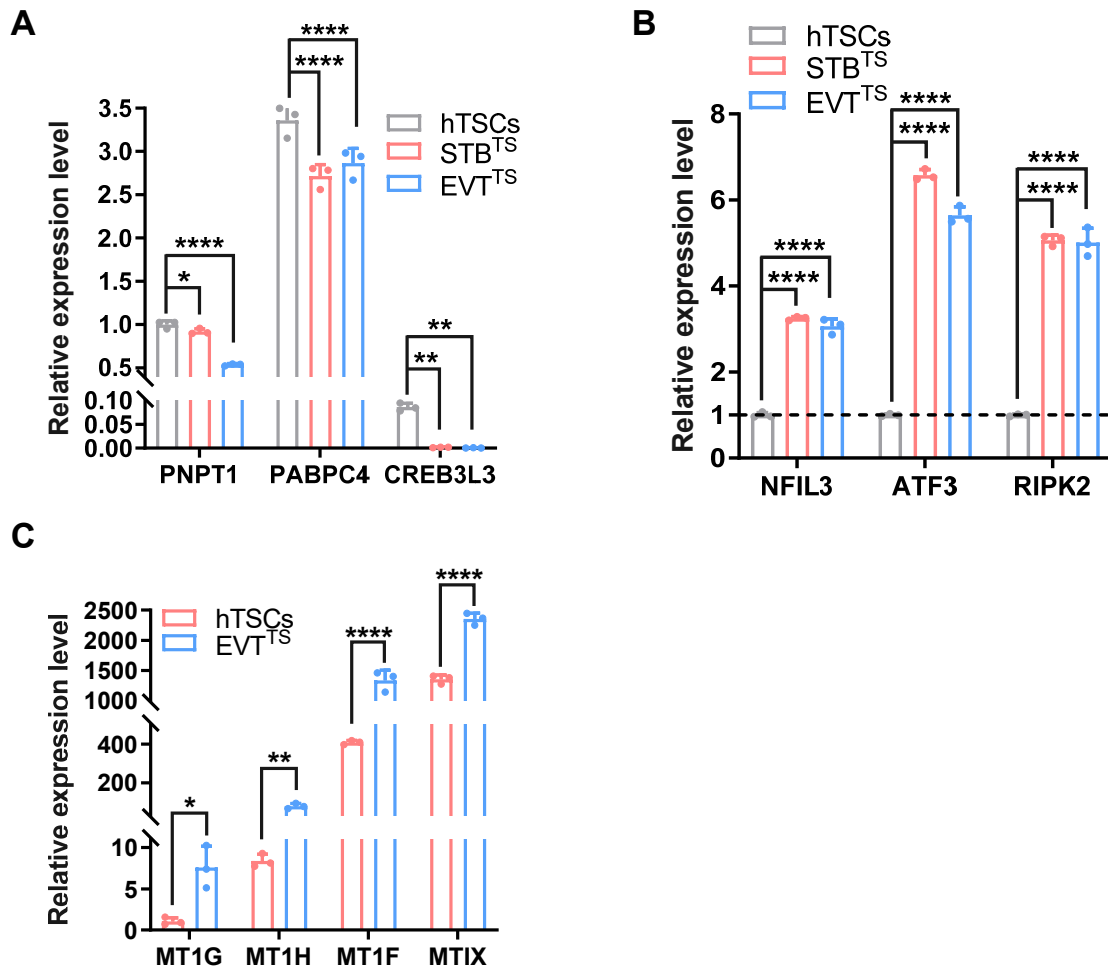

## Figure S5. qRT-PCR analysis of the ISG expression in hTSCs, STB<sup>TS</sup> and EVT<sup>TS</sup>.

(A) Quantification of PNPT1, PABPC4 and CREB3L3 mRNA expression in hTSCs, STB<sup>TS</sup> and EVT<sup>TS</sup>. n=3 independent experiments. Two-way ANOVA analysis was used for statistical analysis of significance. PNPT1, hTSCs vs STB<sup>TS</sup>, \*, p=0.0114. CREB3L3, hTSCs vs STB<sup>TS</sup>, \*\*, p=0.0079. hTSCs vs EVT<sup>TS</sup>, \*\*, p=0.0072. \*\*\*\*, p<0.0001.

(B) Quantification of NFIL3, ATF3 and RIPK2 mRNA expression in hTSCs, STB<sup>TS</sup> and EVT<sup>TS</sup>. n=3 independent experiments. The dashed line indicates the expression of the genes in hTSCs for normalization. Two-way ANOVA analysis was used for statistical analysis of significance. \*\*\*\*, p<0.0001.

(C) Quantification of MT1G, MT1H, MTIF and MT1X mRNA expression in hTSCs and EVT<sup>TS</sup>. n=3 independent experiments. Two-way ANOVA analysis was used for statistical analysis of significance. \*, p=0.0374. \*\*, p=0.0066. \*\*\*\*, p<0.0001.

Data in this figure are shown as the mean  $\pm$  s.d.

# Figure S6

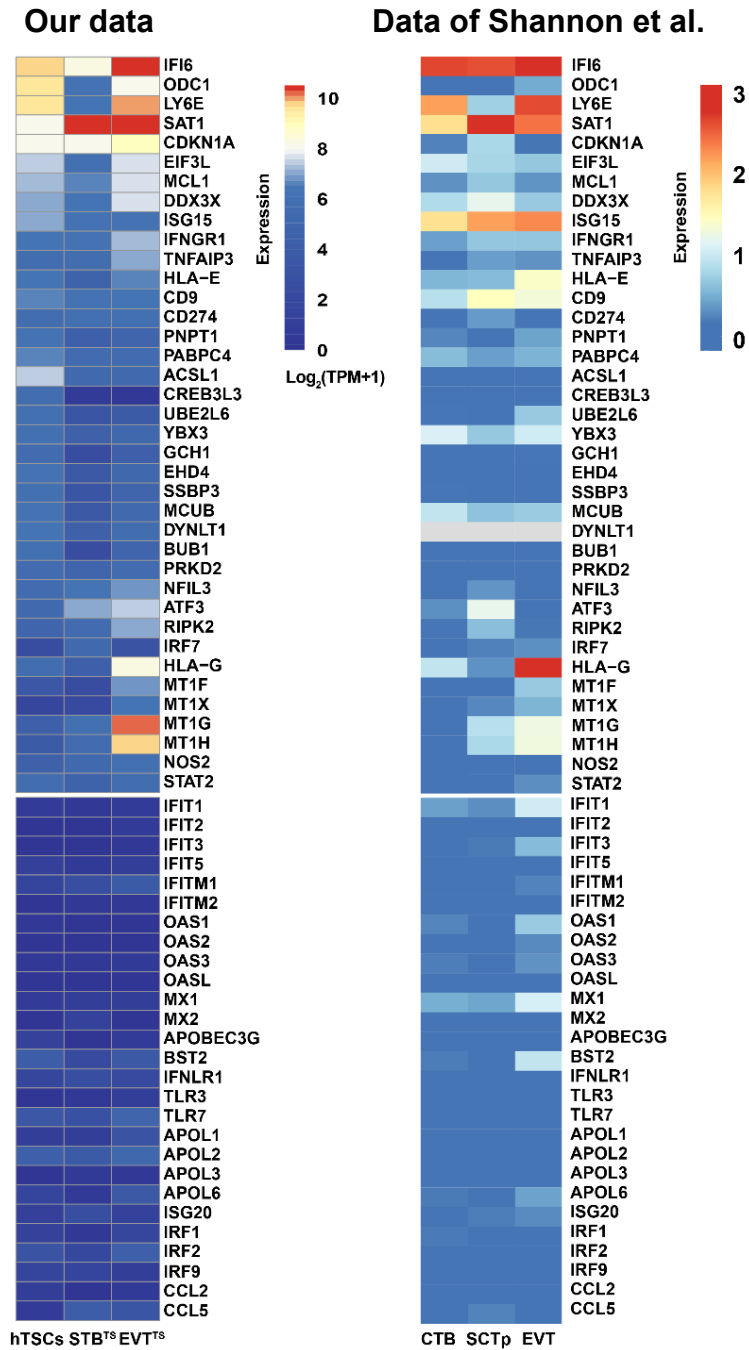

**Figure S6. The relative expression of ISGs in hTSCs/CTB, STB<sup>TS</sup>/SCT<sub>p</sub> and EVT<sup>TS</sup>/EVT of our and competing models.**

Heatmap showing the relative expression of ISGs with high (up) and low (bottom) expression in our hTSCs, STB<sup>TS</sup> and EVT<sup>TS</sup> (left panel), and in CTB, SCT<sub>p</sub> and EVT of competing models (right panel).

# Figure S7

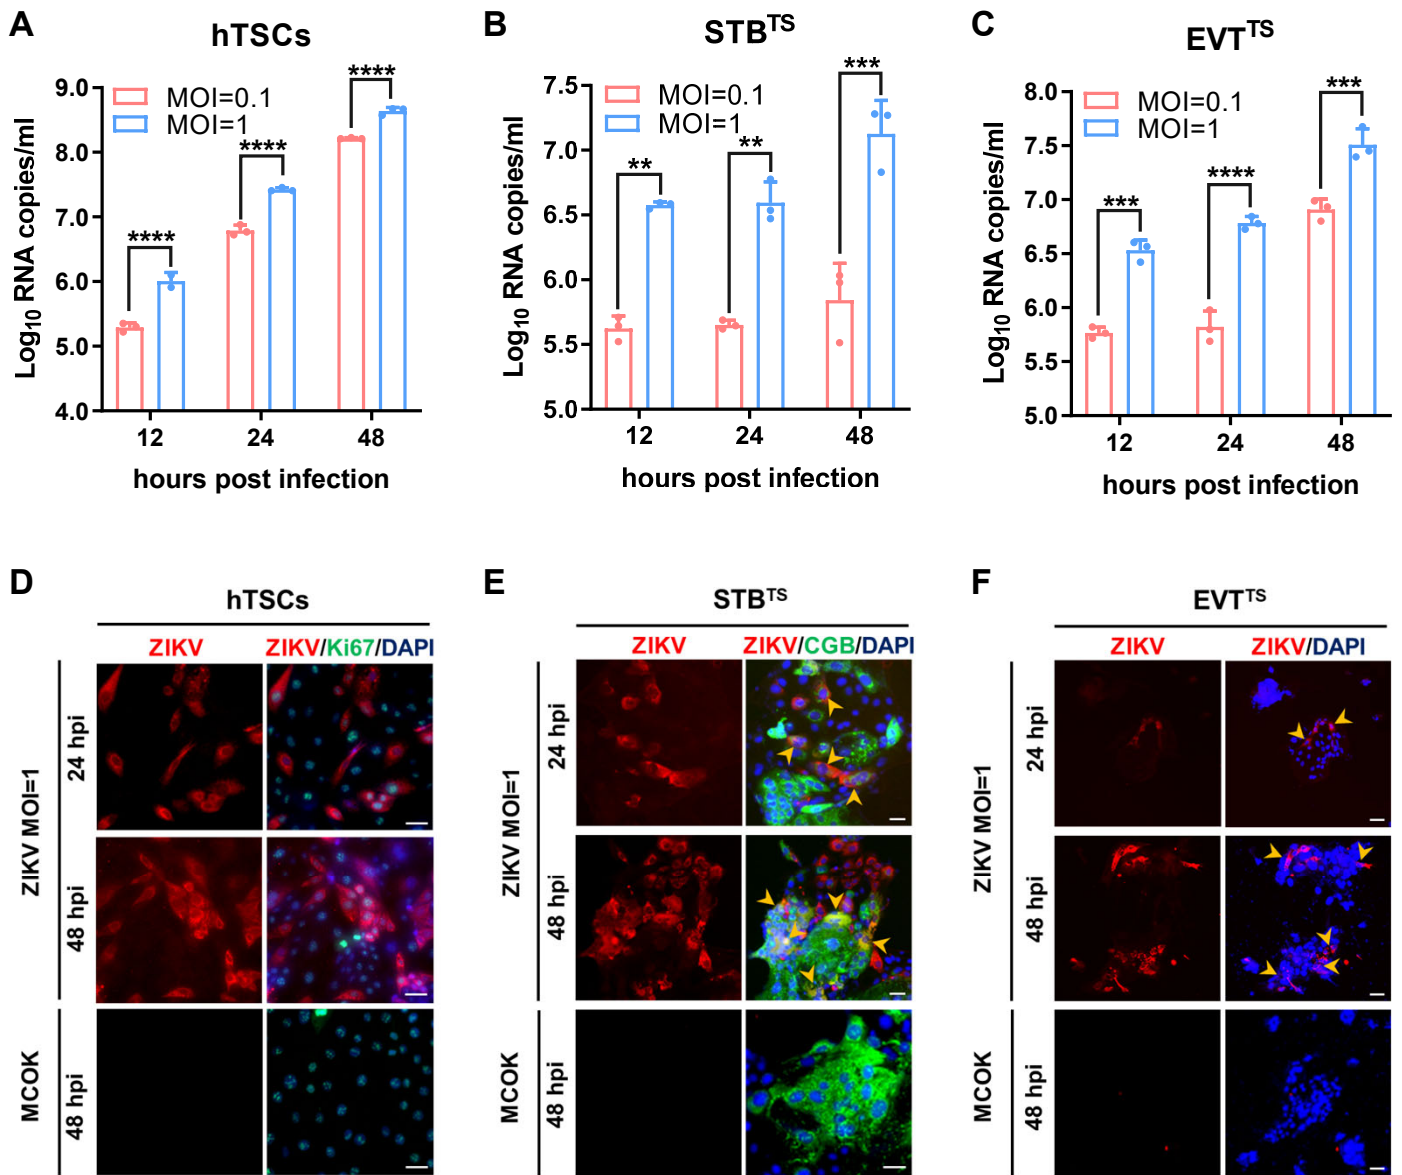

**Figure S7. Comparison of the ZIKV infection features of the hTSCs, STB<sup>TS</sup> and EVT<sup>TS</sup> infected with ZIKV at MOI 0.1 and 1.**

(A, B and C) Quantification of ZIKV RNA in the supernatants of hTSCs (panel A), STB<sup>TS</sup> (panel B) and EVT<sup>TS</sup> (panel C) at 12, 24 and 48 hours post infection. The hTSCs, STB<sup>TS</sup> and EVT<sup>TS</sup> were infected with at MOIs of 0.1 and 1. Two-way ANOVA analysis was used for statistical analysis of significance. n=3 independent experiments. Panel B, 12 hpi, MOI=0.1 vs MOI=1, \*\*, p=0.0032. 24 hpi, MOI=0.1 vs MOI=1, \*\*, p=0.0034. 48 hpi, MOI=0.1 vs MOI=1, \*\*\*, p=0.0006. Panel C, 12 hpi, MOI=0.1 vs MOI=1, \*\*\*, p=0.0001. 48 hpi. MOI=0.1 vs MOI=1, \*\*\*, p=0.0005. \*\*\*\*, p<0.0001.

(D, E and F) Immunofluorescence staining for Ki67 (a marker of proliferative CTB), CGB (a marker of STB) and ZIKV E protein in hTSCs (panel D), STB<sup>TS</sup> (panel E) and EVT<sup>TS</sup> (panel F). Nuclei were stained with DAPI. The hTSCs, STB<sup>TS</sup> and EVT<sup>TS</sup> were infected with ZIKV at an MOI of 1 and analyzed at 24 and 48 hours post infection. The yellow arrow heads indicated the positive intracellular ZIKV E signals in STB<sup>TS</sup> and EVT<sup>TS</sup>. Scale bars: 50  $\mu$ m.

Data in this figure are shown as the mean  $\pm$  s.d.



# Figure S8

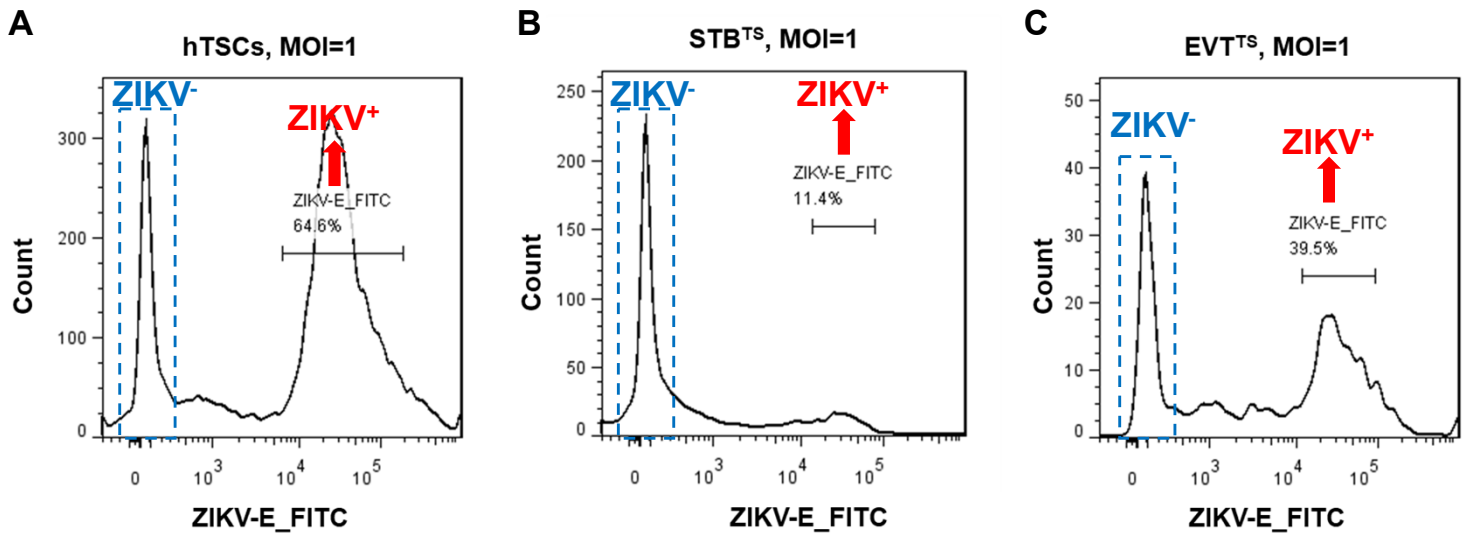

## Figure S8. FACS analysis of ZIKV-infected hTSCs, STB<sup>TS</sup> and EVT<sup>TS</sup>.

(A, B and C) FACS analysis of ZIKV-infected hTSCs (panel A), STB<sup>TS</sup> (panel B) and EVT<sup>TS</sup> (panel C) using ZIKV E protein antibody. The hTSCs, STB<sup>TS</sup> and EVT<sup>TS</sup> were infected with ZIKV at MOI 1 and analyzed at 48 hours post infection. Cells were stained for viral E protein and sorted into ZIKV-infected (ZIKV<sup>+</sup>) and uninfected (ZIKV<sup>-</sup>) cells. Total RNA of ZIKV<sup>+</sup> and ZIKV<sup>-</sup> cells was extracted for qRT-PCR analysis.

# Figure S9

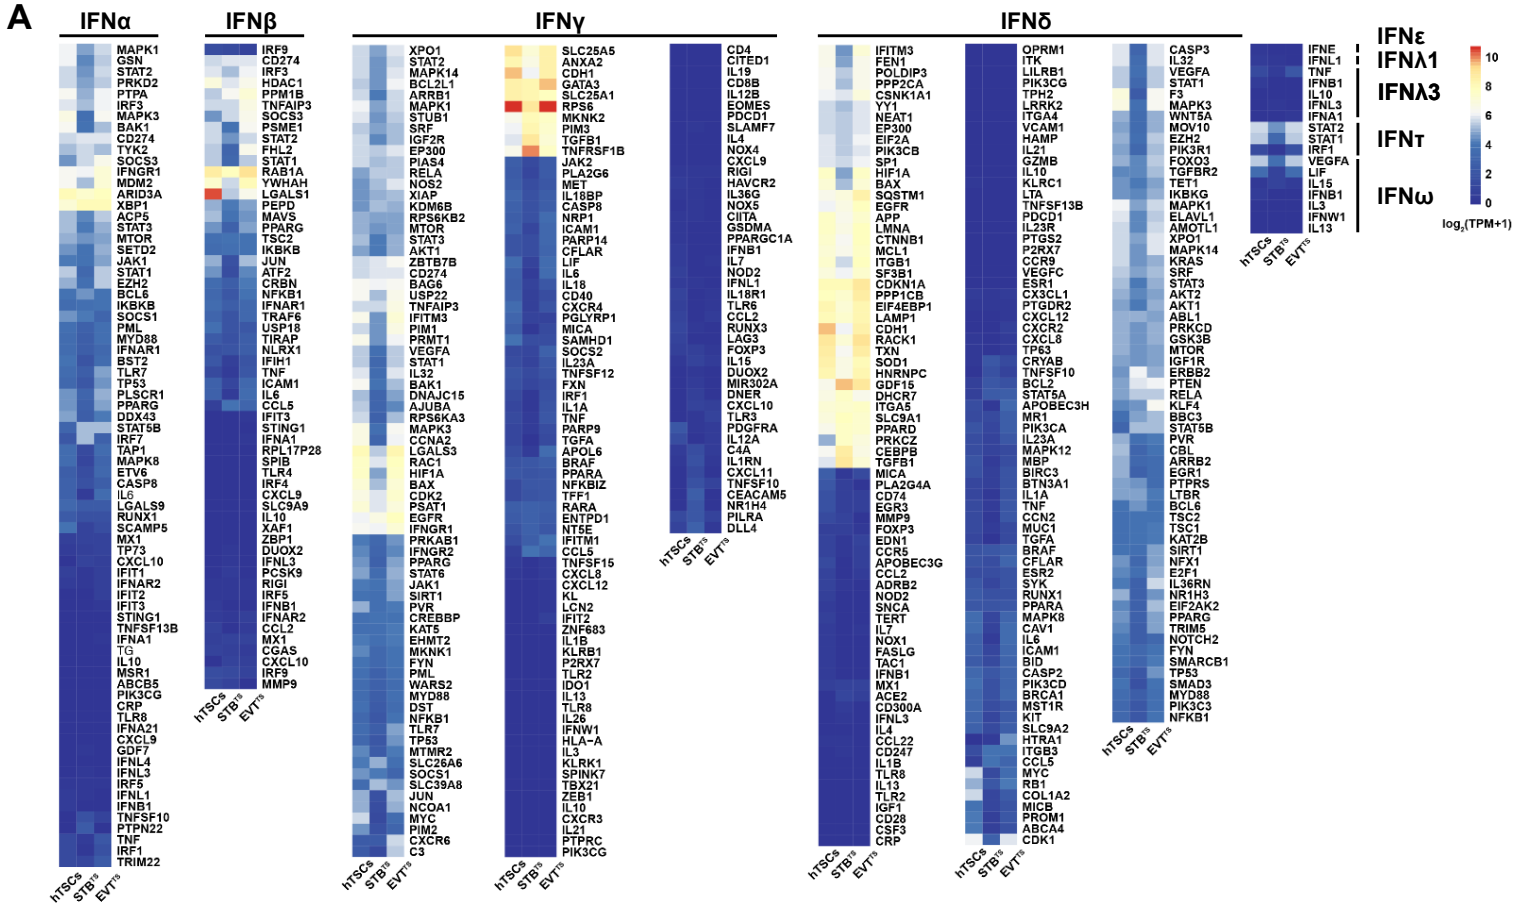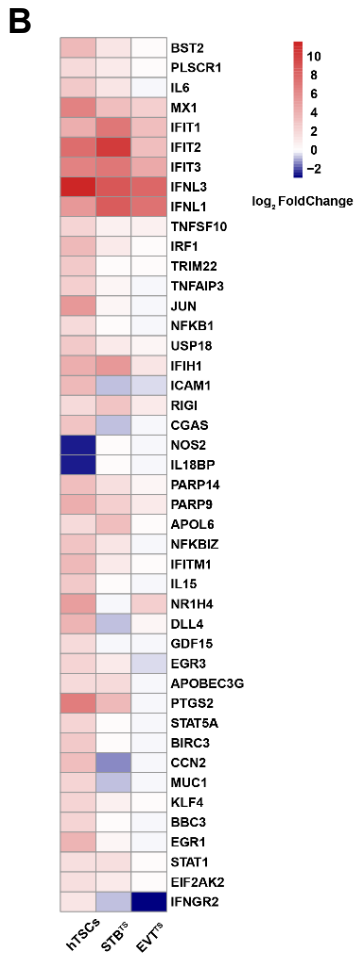

**Figure S9. The relative expression of IFNs in mock- and ZIKV-infected hTSCs, STB<sup>TS</sup> and EVT<sup>TS</sup>.**

(A) Heatmap showing the z-score TPM of IFNs in hTSCs, STB<sup>TS</sup> and EVT<sup>TS</sup>.

(B) Heatmap showing changed IFNs in ZIKV-infected hTSCs, STB<sup>TS</sup> and EVT<sup>TS</sup>.

# Figure S10

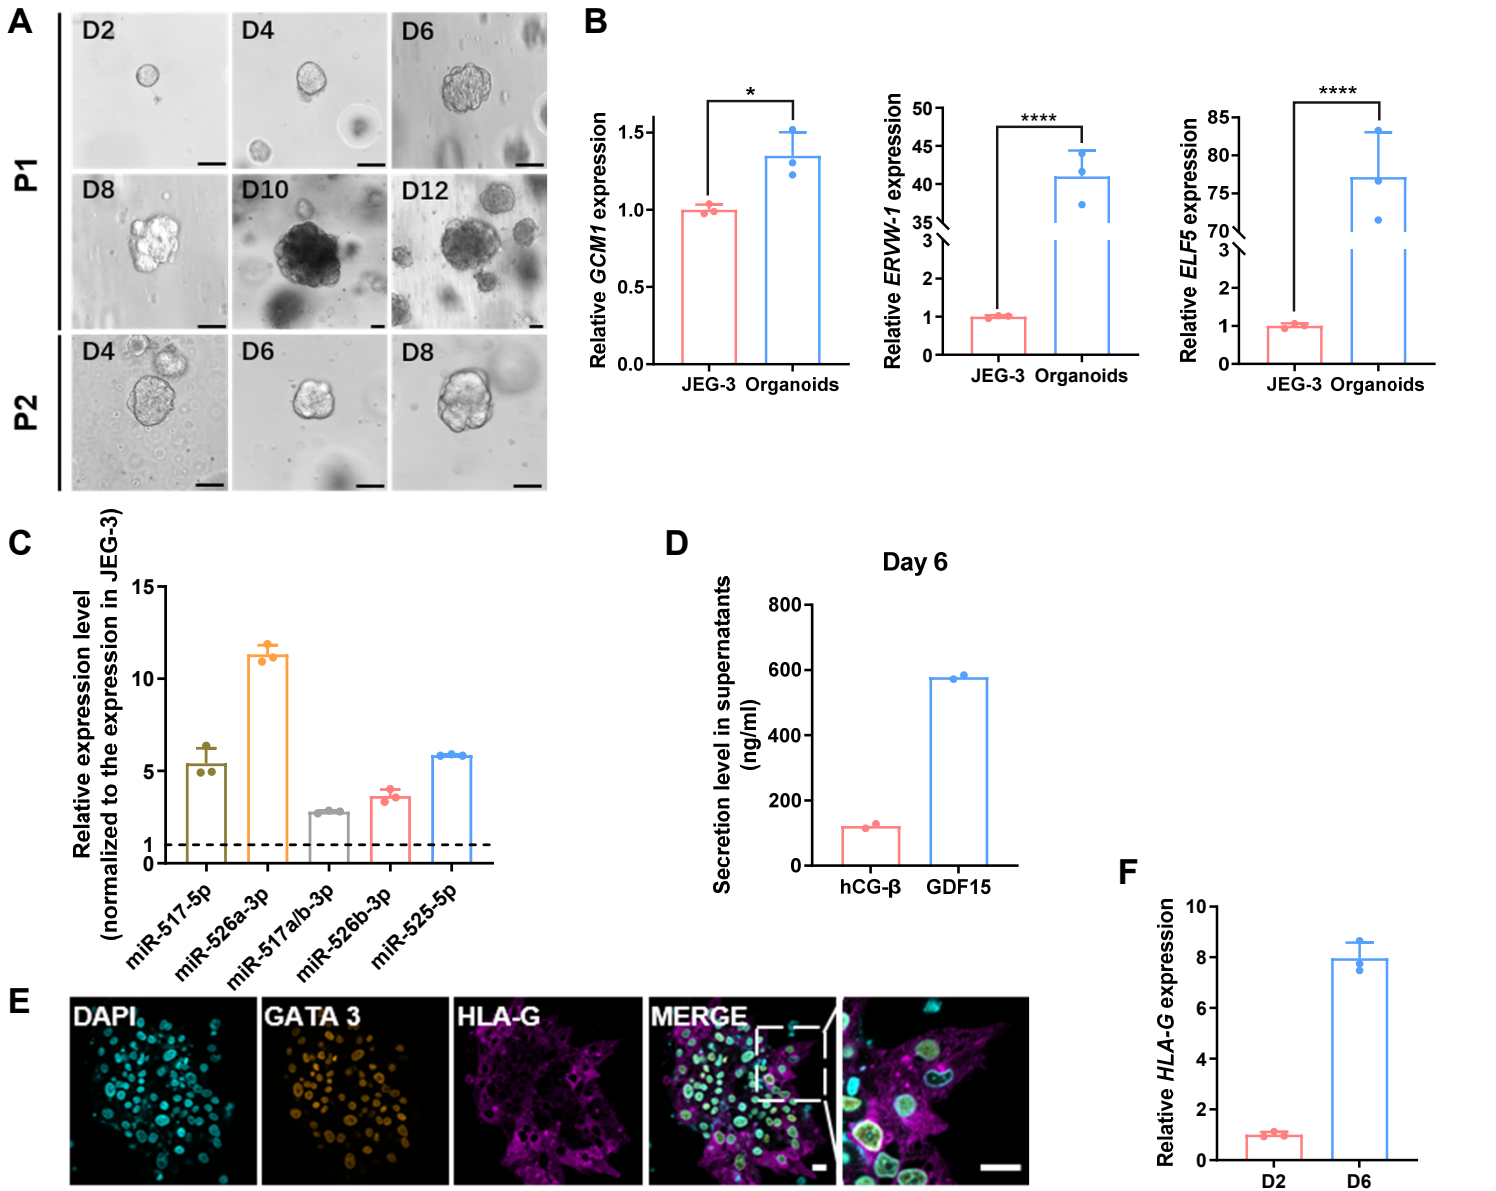

**Figure S10. Molecular characterizations of hTSC-organoids.**

(A) Brightfield images of passage 1 (P1) and passage 2 (P2) hTSC-organoids. D, Day. Scale bars: 50  $\mu$ m.

(B) Quantification of GCM1, ERVW-1, and ELF5 mRNA expression in the choriocarcinoma line JEG-3 (positive controls) and hTSC-organoids. Two-tailed unpaired t test was used for statistical analysis of significance.  $n=3$  independent experiments. Left panel, \*,  $p=0.0177$ . \*\*\*\*,  $p<0.0001$ .

(C) Quantification of miRNAs miR-517-5p, miR-526a-3p, miR-517a/b-3p, miR-526b-3p, and miR-525-5p expression in the choriocarcinoma line JEG-3 (positive controls) and hTSC-derived organoids. Graph showing the relative expression levels of the miRNAs from in organoids to those of JEG-3. The dashed line indicates the expression of the genes in JEG-3 for normalization.  $n=3$  independent experiments.

(D) Quantification of the hCG- $\beta$  and GDF15 secreted by hTSC-organoids by ELISA. The amount of hCG- $\beta$  and GDF15 secreted by organoids at day 6 was shown.  $n=2$  independent experiments.

(E) Immunofluorescence staining for GATA 3 and HLA-G in the EVT cells derived from hTSC-organoids. Nuclei were stained with DAPI. Scale bars: 20  $\mu$ m.

(F) Quantification of HLA-G mRNA expression in the hTSC-organoid-derived EVT at day 2 and day 6 after induction.  $n=3$  independent experiments.

Data in panel B, C and F are shown as the mean  $\pm$  s.d. Data in panel D are shown as mean.

# Figure S11

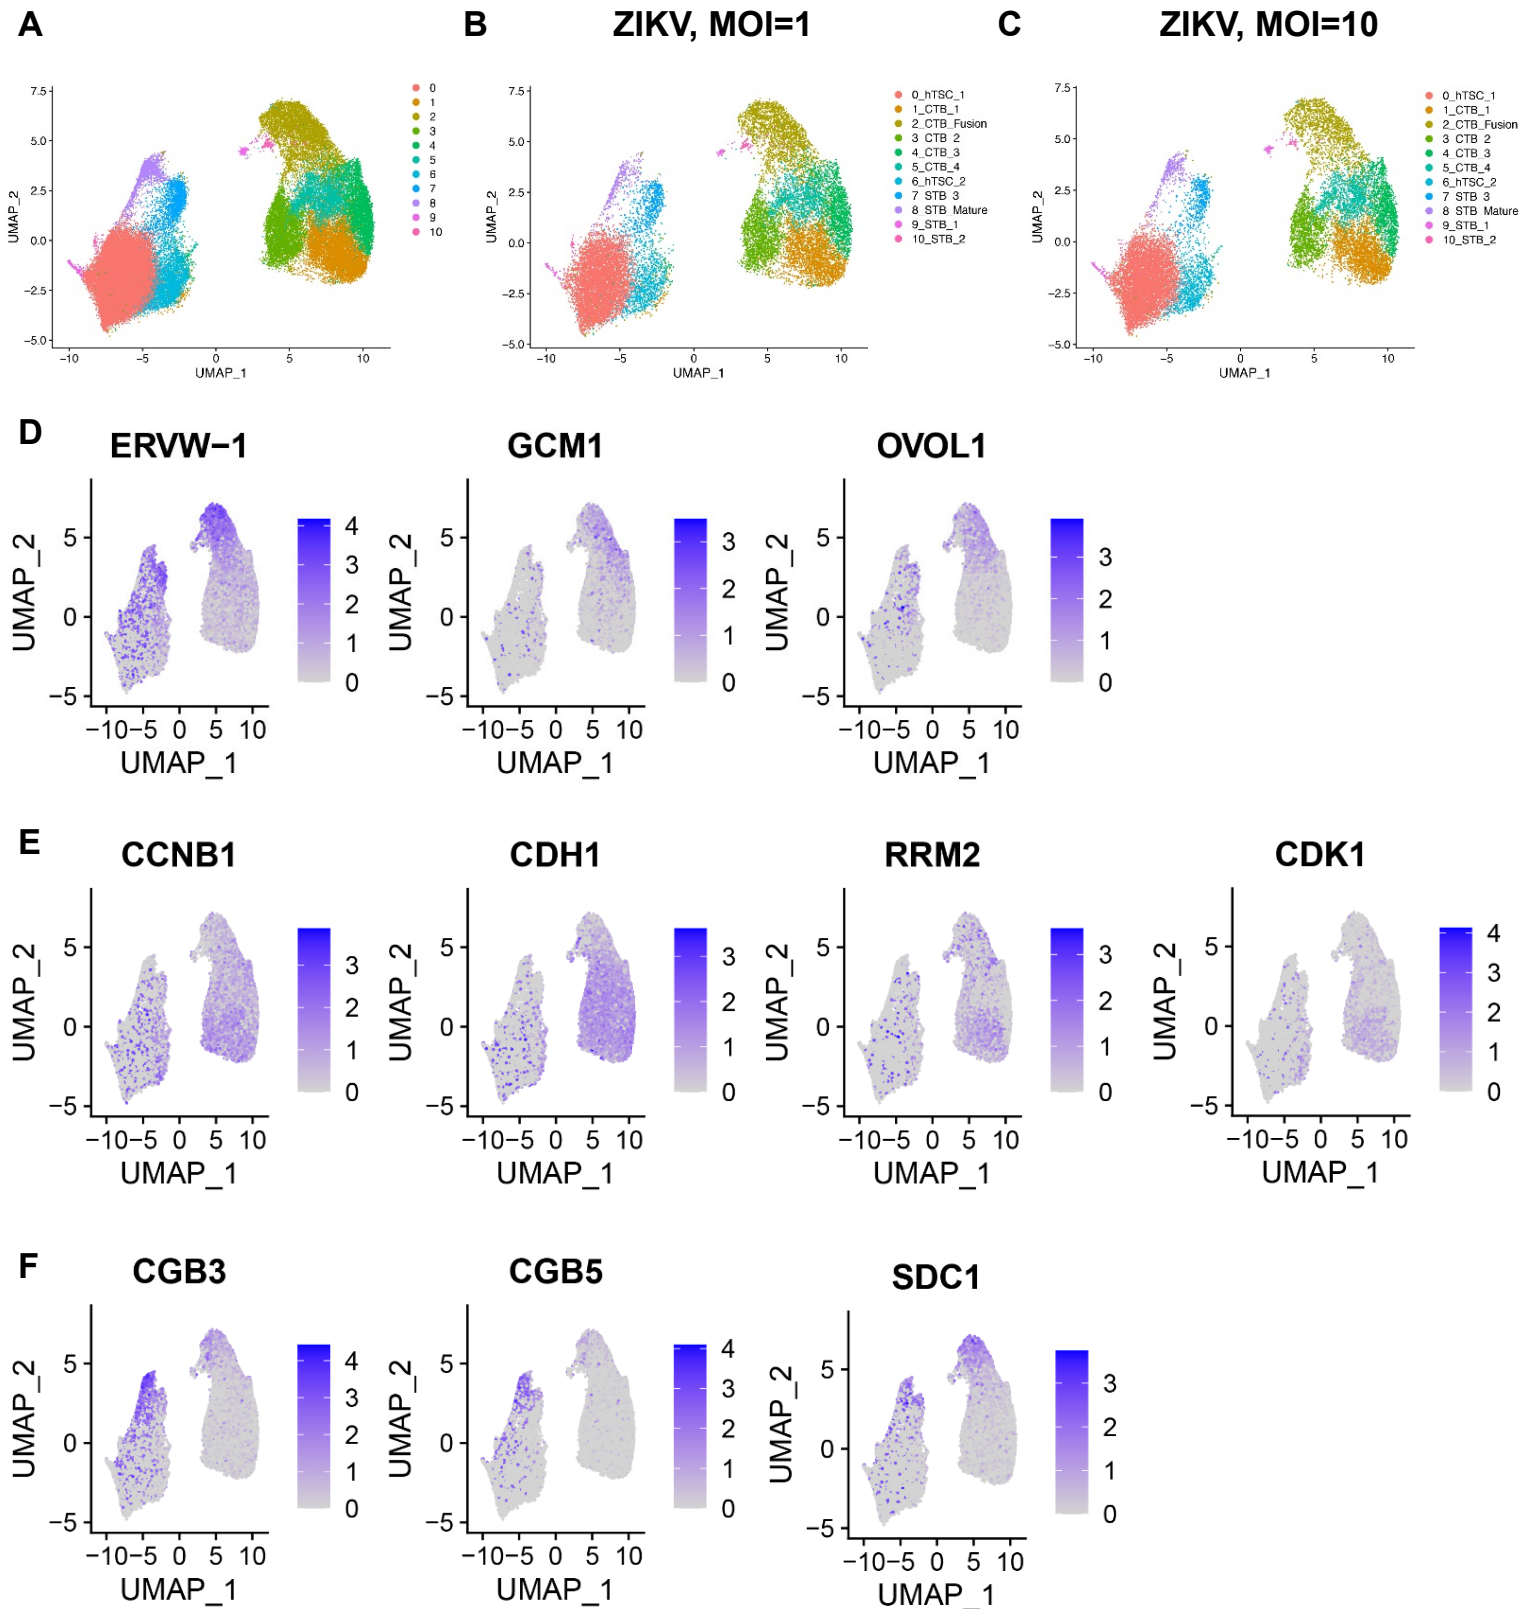

**Figure S11. The transcriptome profile of ZIKV-infected hTSC-organoids at single-cell resolution.**

(A) UMAP showing the integrated datasets of MOCK- and ZIKV-infected hTSC-organoids.

(B) UMAP showing the cell composition of ZIKV-infected hTSC-organoids. The hTSC-organoids were infected with ZIKV at MOIs of 1 (left panel) and 10 (right panel).

(D, E and F) UMAP showing the cells expressing CTB\_Fusion (panel D), CTB (panel E) and STB (panel F) marker genes in hTSC-organoids.

# Figure S12

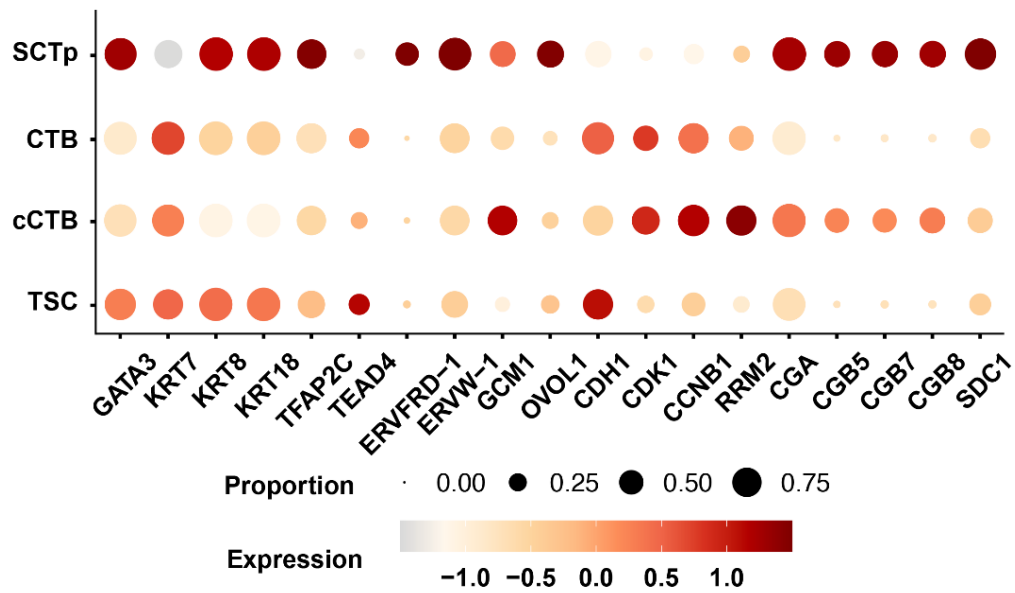

**Figure S12. The expression of trophoblast marker genes in the trophoblast cells of competing models.**

Dot plot indicating the expression of trophoblast marker genes in the scRNA-seq data of competing trophoblast organoids. SCTp, syncytiotrophoblast precursors. cCTB, column CTB-like cell. TSC, trophoblast stem cell.

# Figure S13

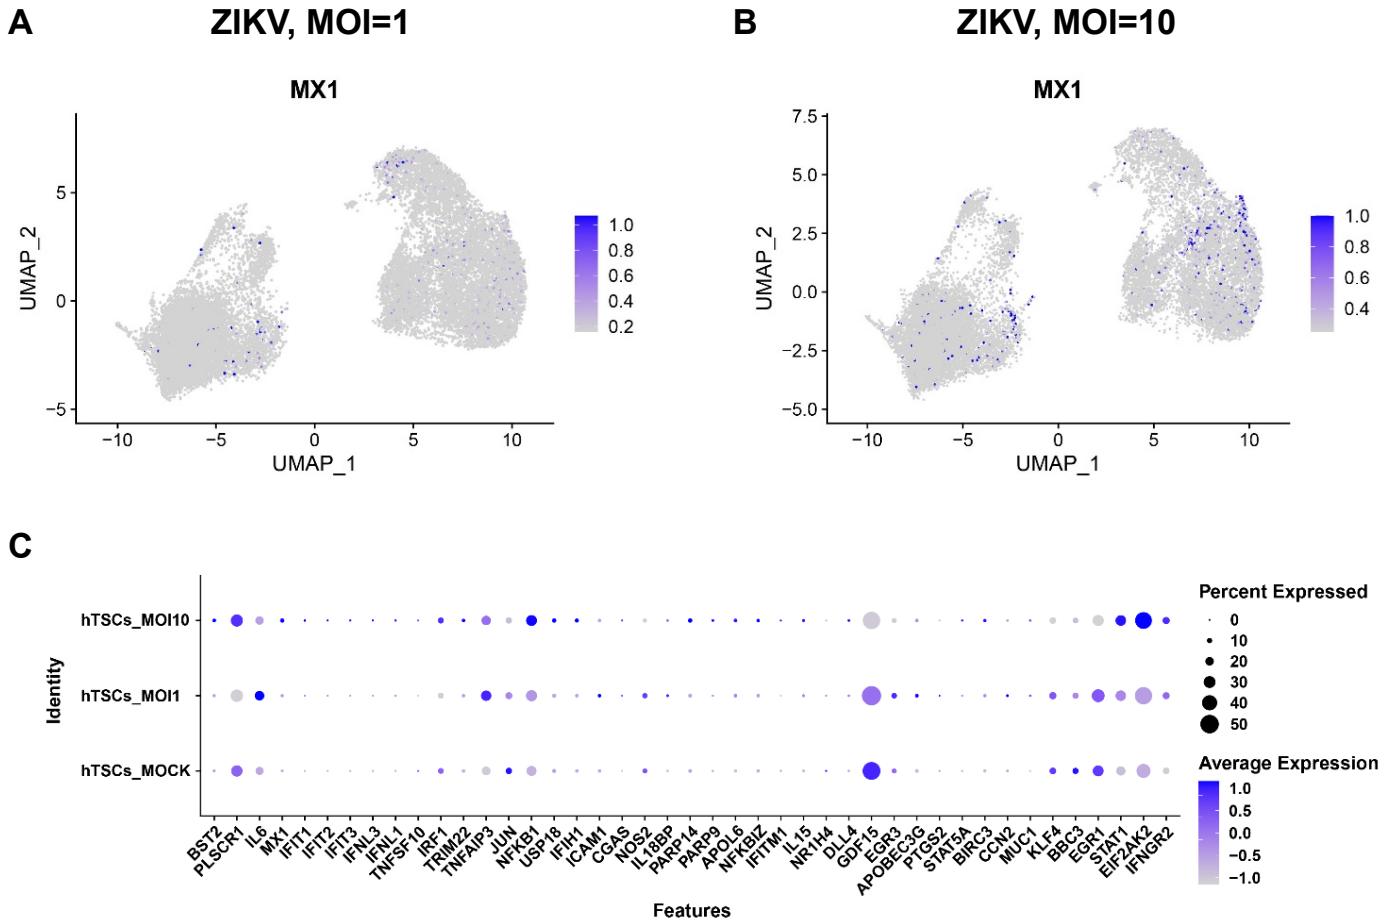

**Figure S13. The expression of IFNs in MX1-positive cells of ZIKV-infected hTSC-organoids.**

(A and B) UMAP showing the MX1-positive cells in the hTSC-organoids infected by ZIKV at an MOI of 1 (panel A) and 10 (panel B).

(C) Dot plot indicating the expression of the IFNs in the hTSCs from mock- and ZIKV (MOI 1 and 10)-infected hTSC-organoids.

# Figure S14

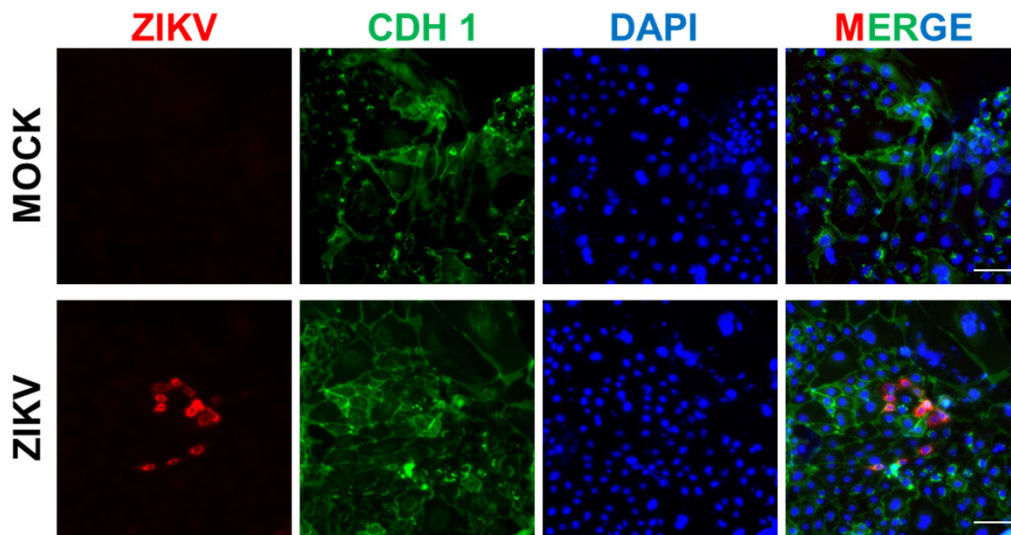

## Figure S14. Immunofluorescence staining for ZIKV and CDH 1 in STB<sup>TS</sup>.

Immunofluorescence staining for ZIKV and CDH 1 in STB<sup>TS</sup>. The hTSCs were infected with ZIKV at an MOI of 1 and induced to STB<sup>TS</sup> and analyzed at 96 hours. The representative images were selected from three independent experiments. Nuclei were stained with DAPI. Scale bars: 100  $\mu$ m.

# Figure S15

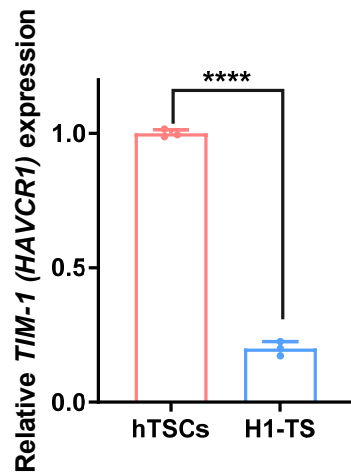

**Figure S15. The expression of TIM-1 (HAVCR1) in blastocyst-derived hTSCs and hESC-derived hTSC-like cells.**

Quantification of TIM-1 (HAVCR1) mRNA expression in blastocyst-derived hTSCs (hTSCs) and hESC-derived hTSC-like cells (H1-TS). Two-tailed unpaired t test was used for statistical analysis of significance. n=3 independent experiments. \*\*\*\*,  $p < 0.0001$ . Data in this figure are shown as the mean  $\pm$  s.d.



**Table S1. Statistical results of ZIKV-positive cells in the hTSCs and STB<sup>TS</sup> infected with ZIKV at 24 hpi.**

|                         | <b>T</b> | <b>P</b> | <b>%</b> |
|-------------------------|----------|----------|----------|
| <b>hTSCs</b>            | 84       | 9        | 10.71429 |
|                         | 134      | 6        | 4.477612 |
|                         | 91       | 3        | 3.296703 |
|                         | 27       | 6        | 22.22222 |
|                         | 76       | 7        | 9.210526 |
|                         | 93       | 7        | 7.526882 |
|                         | 154      | 6        | 3.896104 |
|                         | 49       | 5        | 10.20408 |
|                         | 68       | 6        | 8.823529 |
|                         | 58       | 6        | 10.34483 |
| <b>STB<sup>TS</sup></b> | 65       | 3        | 4.615385 |
|                         | 86       | 5        | 5.813953 |
|                         | 103      | 3        | 2.912621 |
|                         | 140      | 6        | 4.285714 |

T, Total number of nuclei in the field; P, Number of ZIKA E-positive nuclei in the field; %, (P/T)×100.

**Table S2. Statistical results of ZIKV-positive cells in the hTSCs, STB<sup>TS</sup> and EVT<sup>TS</sup> infected with ZIKV at 48 hpi.**

|                         | <b>T</b> | <b>P</b> | <b>%</b> |
|-------------------------|----------|----------|----------|
| <b>hTSCs</b>            | 150      | 10       | 6.666667 |
|                         | 187      | 14       | 7.486631 |
|                         | 196      | 21       | 10.71429 |
|                         | 123      | 8        | 6.504065 |
|                         | 135      | 12       | 8.888889 |
|                         | 272      | 11       | 4.044118 |
|                         | 189      | 15       | 7.936508 |
|                         | 108      | 8        | 7.407407 |
|                         | 194      | 34       | 17.52577 |
|                         | 159      | 10       | 6.289308 |
| <b>STB<sup>TS</sup></b> | 140      | 4        | 2.857143 |
|                         | 175      | 14       | 8        |
|                         | 172      | 10       | 5.813953 |
|                         | 101      | 6        | 5.940594 |
|                         | 93       | 3        | 3.225806 |
|                         | 111      | 15       | 13.51351 |
|                         | 172      | 8        | 4.651163 |
|                         | 102      | 7        | 6.862745 |
| <b>EVT<sup>TS</sup></b> | 92       | 3        | 3.26087  |
|                         | 102      | 6        | 5.882353 |
|                         | 48       | 2        | 4.166667 |
|                         | 41       | 1        | 2.439024 |

T, Total number of nuclei in the field; P, Number of ZIKA E-positive nuclei in the field; %, (P/T)×100.

**Table S3. Statistical results of the fusion index of the STB<sup>TS</sup> differentiated from ZIKV-infected hTSCs.**

| <b>N</b> | <b>S</b> | <b>T</b> |
|----------|----------|----------|
| 80       | 9        | 303      |
| 63       | 7        | 319      |
| 54       | 10       | 280      |
| 97       | 9        | 283      |
| 31       | 9        | 371      |
| 58       | 6        | 488      |
| 72       | 7        | 311      |
| 47       | 10       | 382      |
| 42       | 8        | 304      |
| 46       | 8        | 246      |

N, Number of nuclei in syncytia; S, Number of syncytia; T, Total number of nuclei.

**Table S4. Statistical results of the fusion index of the STB<sup>TS</sup> differentiated from Mock-infected hTSCs.**

| <b>N</b> | <b>S</b> | <b>T</b> |
|----------|----------|----------|
| 79       | 12       | 230      |
| 61       | 10       | 281      |
| 82       | 11       | 253      |
| 115      | 9        | 221      |
| 32       | 8        | 232      |
| 59       | 7        | 212      |
| 72       | 8        | 209      |
| 59       | 10       | 198      |
| 62       | 10       | 272      |
| 75       | 9        | 225      |

N, Number of nuclei in syncytia; S, Number of syncytia; T, Total number of nuclei.

**Table S5. Primers for qPCR and qRT-PCR.**

| <b>Primer</b>      | <b>Sequence (5'-3')</b>          |
|--------------------|----------------------------------|
| ZIKV-F             | GGTCAGCGTCCTCTCTAATAAACG         |
| ZIKV-R             | GCACCCTAGTGTCCACTTTTTCC          |
| ZIKV-Probe         | FAM-AGCCATGACCGACACCACACCGT-BHQ1 |
| AXL-RT-F           | CCGTGGACCTACTCTGGCT              |
| AXL-RT-R           | CCTTGGCGTTATGGGCTTC              |
| TIM-1-RT-F         | TGGCAGATTCTGTAGCTGGTT            |
| TIM-1-RT-R         | AGAGAACATGAGCCTCTATTCCA          |
| TYRO3-RT-F         | CAGCCGGTGAAGCTCAACT              |
| TYRO3-RT-R         | TGGCACACCTTCTACCGTGA             |
| MERTK-RT-F         | CTCTGGCGTAGAGCTATCACT            |
| MERTK-RT-R         | AGGCTGGGTTGGTGAAAACA             |
| GCM1-RT-F          | TTCCCGGTCACCAACTTCTG             |
| GCM1-RT-R          | GTAAACTCCCCTGACTTTGTGTT          |
| ERVW-1-RT-F        | ATGCCCCGCAACTGCTATC              |
| ERVW-1-RT-R        | AGACAGTGACTCCAAGTCCTC            |
| ERVFRD-1-RT-F      | ACCGCCATCCTGATTTCCC              |
| ERVFRD-1-RT-R      | GAGGCTGGATAAGCTGTCCC             |
| OVOL1-RT-F         | TGAACATGAGCCTTCGAGACT            |
| OVOL1-RT-R         | CAAGGGTCACCTTCATCTTGG            |
| HLA-G-RT-F         | GAGGAGACACGGAACACCAAG            |
| HLF-G-RT-R         | GTCCGAGCCAATCATCCACT             |
| miR-517-5p-RT-F    | TCGGCAGGCCTCTAGATGGAAG           |
| miR-526a-3p-RT-F   | TCGGCAGGGAAAGCGCTTCCTT           |
| miR-517a/b-3p-RT-F | TCGGCAGGATCGTGCATCCCTT           |
| miR-526b-3p-RT-F   | TCGGCAGGGAAAGTGCTTCCTT           |
| miR-525-5p-RT-F    | TCGGCAGGGAAAGGCGCTTCCTT          |

RT, Real-time; F, Forward; R, Reverse.

**Table S6. sgRNAs for gene knockout.**

| <b>Primer</b> | <b>Sequence (5'-3')</b> |
|---------------|-------------------------|
| AXL sgRNA-F   | GGGACTCACGGGCACCCTT     |
| AXL sgRNA-R   | AAGGGTGCCCGTGAGTCCCC    |
| TIM-1 sgRNA-F | TCATGTCATTGAACCACCCA    |
| TIM-1 sgRNA-R | TGGGTGGTTCAATGACATGA    |
| TYRO3 sgRNA-F | CGGCCGGTACTGGTGCCAGG    |
| TYRO3 sgRNA-R | CCTGGCACCAGTACCGGCCG    |
| MERTK sgRNA-F | TAGGGGCTTTGATTCGACAG    |
| MERTK sgRNA-R | CTGTCGAATCAAAGCCCCTA    |

F, Forward; R, Reverse.

**Table S7. Primers for genotyping.**

| <b>Primer</b> | <b>Sequence (5'-3')</b> |
|---------------|-------------------------|
| AXL-GT-F      | AGCGCGACCTGTTAAGTCTC    |
| AXL-GT-R      | AGTGGTCAAACCTGGGGTTCC   |
| TIM-1-GT-F    | CCACTACAGTGGAGCTGTCA    |
| TIM-1-GT-R    | AGGACTTACGGGAACCTCCTC   |
| TYRO3-GT-F    | AGTTGTACATCCCAGTCAGCG   |
| TYRO3-GT-R    | GCTCAAGCAACGGAAACAGA    |
| MERTK-GT-F    | CTTGAGCCCTGCTGTGTCAT    |
| MERTK-GT-R    | TGATGTGCCCCAAGCAATTC    |

GT, Genotyping; F, Forward; R, Reverse.

**Table S8. qRT-PCR primers for detection of ISG expression**

| Primer (F, Forward; R, Reverse) | Sequence (5'-3')        |
|---------------------------------|-------------------------|
| IFI6-RT-F                       | GGTCTGCGATCCTGAATGGG    |
| IFI6-RT-R                       | TCACTATCGAGATACTTGTGGGT |
| ODC1-RT-F                       | TTTACTGCCAAGGACATTCTGG  |
| ODC1-RT-R                       | GGAGAGCTTTTAACCACTCAG   |
| LY6E-RT-F                       | CAGCTCGCTGATGTGCTTCT    |
| LY6E-RT-R                       | CAGACACAGTCACGCAGTAGT   |
| SAT1-RT-F                       | ACCCGTGGATTGGCAAGTTAT   |
| SAT1-RT-R                       | TGCAACCTGGCTTAGATTCTTC  |
| CDKN1A-RT-F                     | TGTCCGTCAGAACCCATGC     |
| CDKN1A-RT-R                     | AAAGTCGAAGTTCATCGCTC    |
| EIF3L-RT-F                      | TGACCCCTACGCTTATCCCAG   |
| EIF3L-RT-R                      | GTTTGTCTTTCATACTGACGTTT |
| MCL1-RT-F                       | TGCTTCGAAACTGGACATCA    |
| MCL1-RT-R                       | TAGCCACAAAGGCACCAAAG    |
| DDX3X-RT-F                      | AGCAGTTTTGGATCTCGTAGTG  |
| DDX3X-RT-R                      | ACTGTTCCACCACGTTCAAAT   |
| ISG15-RT-F                      | CGCAGATCACCCAGAAGATCG   |
| ISG15-RT-R                      | TTCGTCGCATTTGTCCACCA    |
| IFNGR1-RT-F                     | TCTTTGGGTCAGAGTTAAAGCCA |
| IFNGR1-RT-R                     | TTCCATCTCGGCATACAGCAA   |
| TNFAIP3-RT-F                    | TCCTCAGGCTTTGATTTGAGC   |
| TNFAIP3-RT-R                    | TGTGTATCGGTGCATGGTTTTA  |
| IFIT1-RT-F                      | AGAAGCAGGCAATCACAGAAAA  |
| IFIT1-RT-R                      | CTGAAACCGACCATAGTGGAAT  |
| IFIT2-RT-F                      | AAGCACCTCAAAGGGCAAAC    |
| IFIT2-RT-R                      | TCGGCCCATGTGATAGTAGAC   |
| IFIT3-RT-F                      | AGAAAAGGTGACCTAGACAAAGC |
| IFIT3-RT-R                      | CCTTGTAGCAGCACCCAATCT   |
| IFIT5-RT-F                      | GGCCAAAATAAAGACGCCCTT   |
| IFIT5-RT-R                      | GACCAGGCTTCGTACTTCTTC   |
| IFITM1-RT-F                     | CCAAGGTCCACCGTGATTAAC   |
| IFITM1-RT-R                     | ACCAGTTCAAGAAGAGGGTGTT  |
| IFITM2-RT-F                     | ATGAACCACATTGTGCAAACCT  |
| IFITM2-RT-R                     | CCCAGCATAGCCACTTCT      |
| TLR3-RT-F                       | TTGCCTTGATCTACTTTTGGGG  |
| TLR3-RT-R                       | TCAACACTGTTATGTTTGTGGGT |
| TLR7-RT-F                       | TCCTTGGGGCTAGATGGTTTC   |
| TLR7-RT-R                       | TCCACGATCACATGGTTCTTTG  |
| IRF1-RT-F                       | ATGCCCATCACTCGGATGC     |
| IRF1-RT-R                       | CCCTGCTTTGTATCGGCCTG    |
| IRF2-RT-F                       | CATGCGGCTAGACATGGGTG    |
| IRF2-RT-R                       | GCTTTCCTGTATGGATTGCC    |
| IRF7-RT-F                       | GCTGGACGTGACCATCATGTA   |
| IRF7-RT-R                       | GGGCCGTATAGGAACGTGC     |
| IRF9-RT-F                       | GCCCTACAAGGTGTATCAGTTG  |
| IRF9-RT-R                       | TGCTGTGCTTTGATGGTACT    |
| IFIH1-RT-F                      | TCGAATGGGTATTCCACAGACG  |
| IFIH1-RT-R                      | GTGGCGACTGTCCTCTGAA     |
| MX1-RT-F                        | GTTTCCGAAGTGGACATCGCA   |
| MX1-RT-R                        | CTGCACAGGTTGTTCTCAGC    |
| EPSTI1-RT-F                     | ACCCGCAATAGAGTGGTGAAC   |
| EPSTI1-RT-R                     | GCTATCAAGGTGTATGCACTTGT |
| OAS1-RT-F                       | TGTCCAAGGTGGTAAAGGGTG   |
| OAS1-RT-R                       | CCGGCGATTTAACTGATCCTG   |
| OAS2-RT-F                       | CTCAGAAGCTGGGTTGGTTTAT  |
| OAS2-RT-R                       | ACCATCTCGTCGATCAGTGTC   |
| OAS3-RT-F                       | GAAGGAGTTCGTAGAGAAGGCG  |

|              |                             |
|--------------|-----------------------------|
| OAS3-RT-R    | CCCTTGACAGTTTTTCAGCACC      |
| OASL-RT-F    | CTGATGCAGGAACTGTATAGCAC     |
| OASL-RT-R    | CACAGCGTCTAGCACCTCTT        |
| APOL1-RT-F   | TGGACTACGGAAAGAAGTGGT       |
| APOL1-RT-R   | CCTCCTTCAATTTGTCAAGGCTT     |
| APOL6-RT-F   | ACCAGGCGGAGAGAGAAAAGT       |
| APOL6-RT-R   | TGTAGCTCCACGTCTTCACAC       |
| IFI27-RT-F   | TGCTCTCACCTCATCAGCAGT       |
| IFI27-RT-R   | CACAACTCCTCCAATCACAACCT     |
| PARP12-RT-F  | GCTTGACAACCGAACACAACC       |
| PARP12-RT-R  | GGCATAGCTCATTATAGCTCAGG     |
| EIF2AK2-RT-F | GCCGCTAAACTTGCATATCTTCA     |
| EIF2AK2-RT-R | TCACACGTAGTAGCAAAAAGAACC    |
| IFITM3-RT-F  | TGTCCAAACCTTCTTCTCTCC       |
| IFITM3-RT-R  | CGTCGCCAACCATCTTCC          |
| PNPT1-RT-F   | GCGAGCACTATGGAGTAGCG        |
| PNPT1-RT-R   | GCAGTGTACCTGACTGTACTA       |
| PABPC4-RT-F  | AAGCCAATCCGCATCATGTG        |
| PABPC4-RT-R  | CTCTTGGGTCTCGAAGTGGAC       |
| CREB3L3-RT-F | ATGAATACGGATTTAGCTGCTGG     |
| CREB3L3-RT-R | AGGAAGTCGTCAGAGTCGGG        |
| MT1G-RT-F    | CTTCTCGCTTGGGAACTCTA        |
| MT1G-RT-R    | AGGGGTCAAGATTGTAGCAA        |
| MT1H-RT-F    | ATCTGCAAAGGGGCGTCAG         |
| MT1H-RT-R    | GAATGTAGCAAATGAGTCGGAGTT    |
| MT1F-RT-F    | GAATGTAGCAAATGGGTCAAGGTG    |
| MT1F-RT-R    | TCTCCTGCACCTGCGCTGGT        |
| MT1X-RT-F    | GACCCCAACTGCTCCTGCTCG       |
| MT1X-RT-R    | GATGTAGCAAACGGGTCAGGGTTGTAC |

---
